# Supplementary material
Source: PubMed Central journal article supplement (PMC7473776)
Supplement: NIHMS1614835-supplement-1.pdf [file NIHMS1614835-supplement-1.pdf]

### Supplementary materials

The supplemental materials includes supplemental figures.

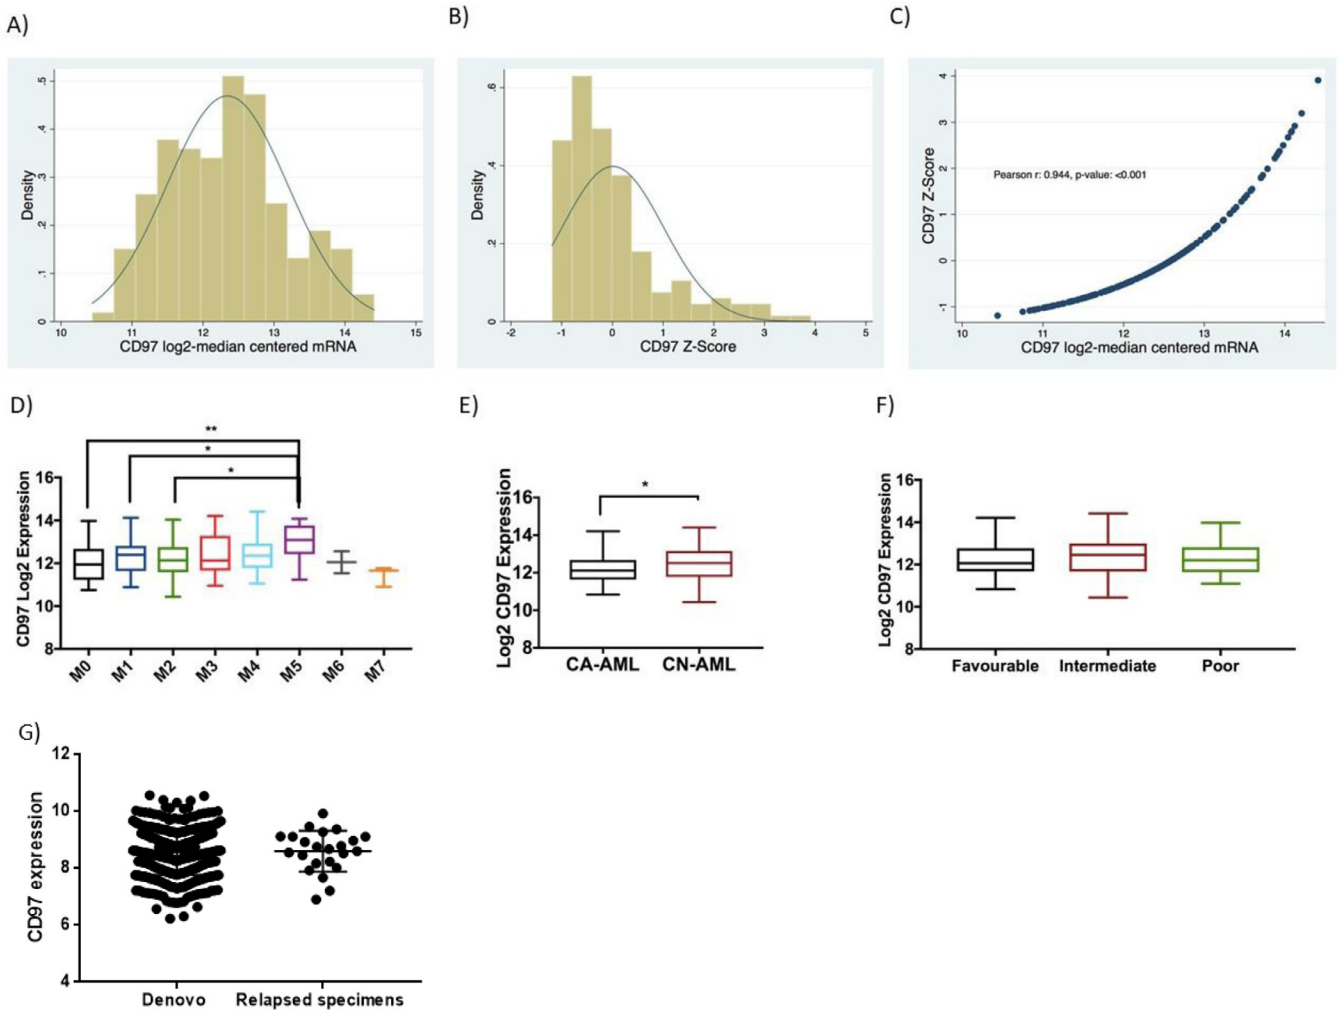

**Figure S1. *CD97* Z-score and mRNA expression distribution.** (A) Histogram of *CD97* Log2 transformed mRNA expression; (B) *CD97* mRNA expression Z score; (C) Scatterplot of *CD97* Z-score vs *CD97* log2 mRNA expression. Relative *CD97* log2 mRNA expression categorized by (D) FAB classification; (E) cytogenetic status and (F) risk status. (G) *CD97* expression in relapsed vs. de novo AML samples from the BEAT AML cohort analyzed using Vizome tool. \* $P < 0.05$  \*\* $P < 0.01$

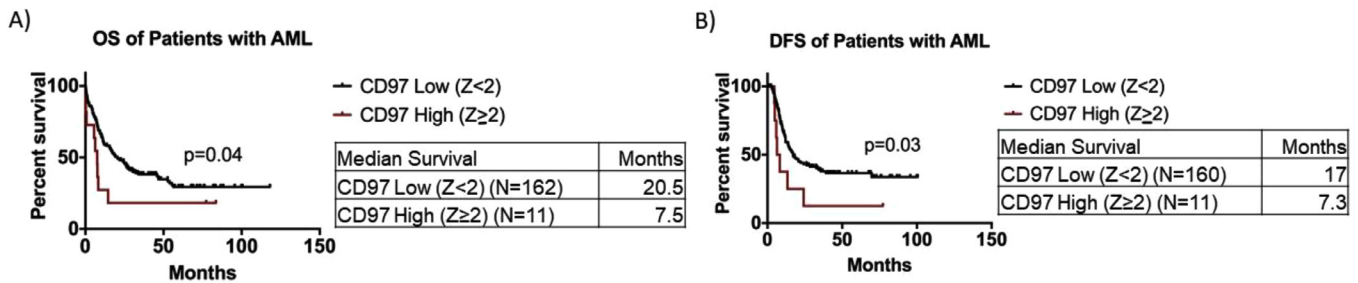

**Figure S2. Survival analysis of AML patients according to *CD97* expression.** (A) Overall Survival of 173 AML Patients with *CD97* Z-score  $> 2$  and *CD97* Z-score  $< 2$ ; (B) Disease-free Survival of 171 AML Patients with *CD97* Z-score  $> 2$  and *CD97* Z-score  $< 2$ .

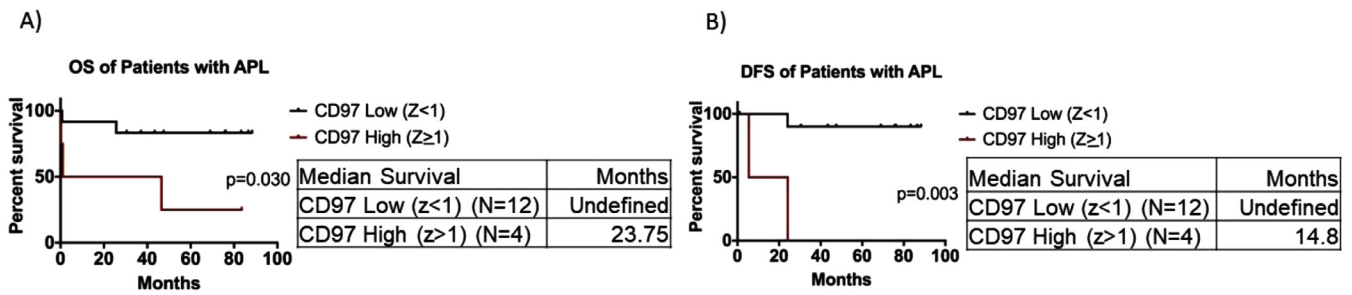

Figure S3. Survival analysis of AML patients with APL according to *CD97* expression. (A) Overall Survival of AML patients with APL with *CD97* Z-score $\geq 1$  and *CD97* Z-score $< 1$ ; (B) Disease-free Survival of AML patients with APL with *CD97* Z-score $\geq 1$  and *CD97* Z-score $< 1$ .

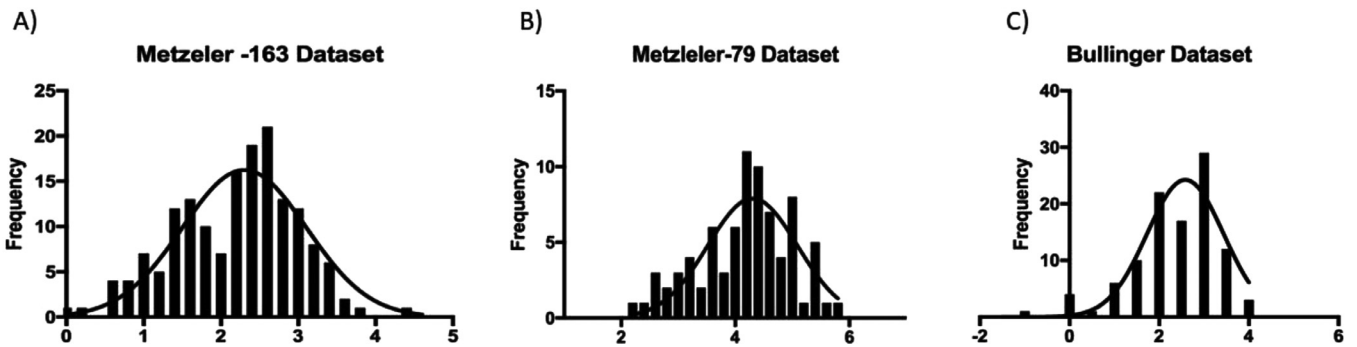

Figure S4. *CD97* mRNA expression distribution. Histogram of *CD97* mRNA expression of (A) Metzeler-163 dataset; (B) Metzeler-79 dataset; (C) Bullinger dataset.

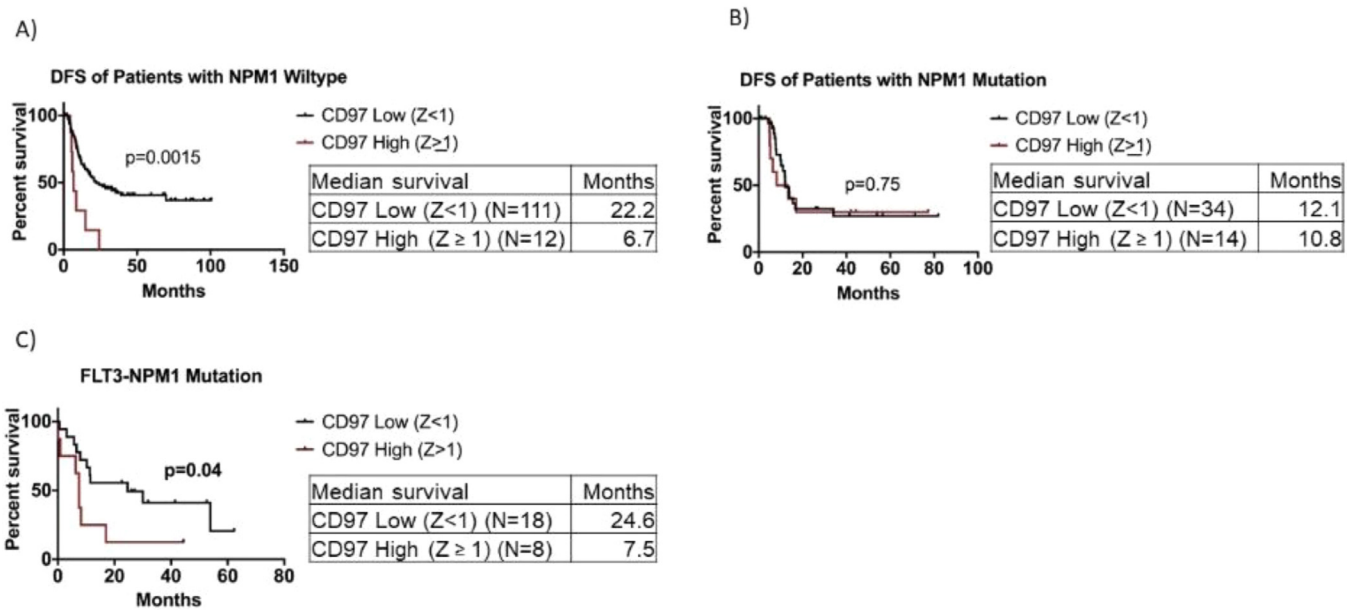

Figure S5. Survival analysis of AML patients according to *CD97* expression after stratification based on *NPM1* mutation status (A) Disease free Survival of AML patients with *CD97* high (Z-score $\geq 1$ ) vs *CD97* low (Z-score $< 1$ ) in patients with *NPM1* wild type gene. (B) Disease free Survival of AML patients with *CD97* high (Z-score $\geq 1$ ) vs *CD97* low (Z-score $< 1$ ) in patients with *NPM1* mutation. (C) OS AML patients with *CD97* high (Z-score $\geq 1$ ) vs *CD97* low (Z-score $< 1$ ) in patients with FLT3 and *NPM1* mutation

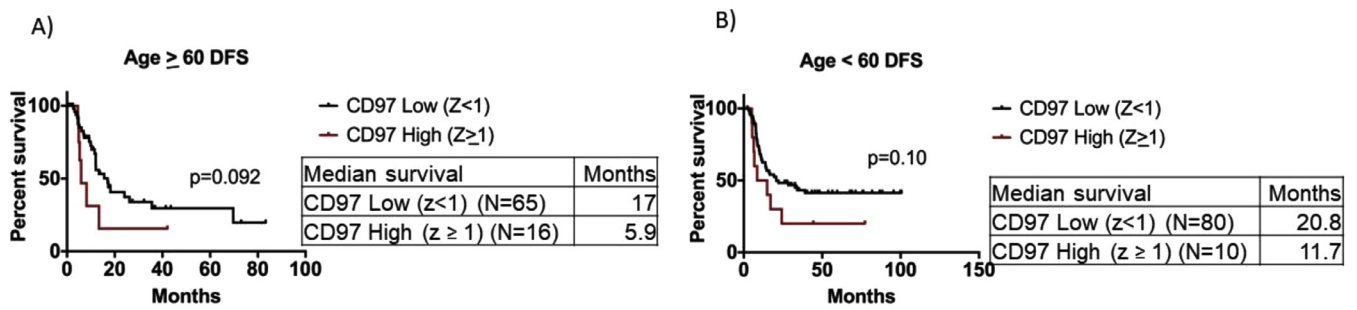

**Figure S6. Survival analysis of AML patients according to *CD97* expression after stratification based on age.** (A) Disease free Survival of AML patients with *CD97* high (Z-score $\geq$ 1) vs *CD97* low (Z-score $<$ 1) in patients  $\geq$  60 years of age. (B) Disease free Survival of AML patients with *CD97* high (Z-score $\geq$ 1) vs *CD97* low (Z-score $<$ 1) in patients  $<$ 60 years of age

### Z-SCORE>2 COMPARISON ANALYSIS

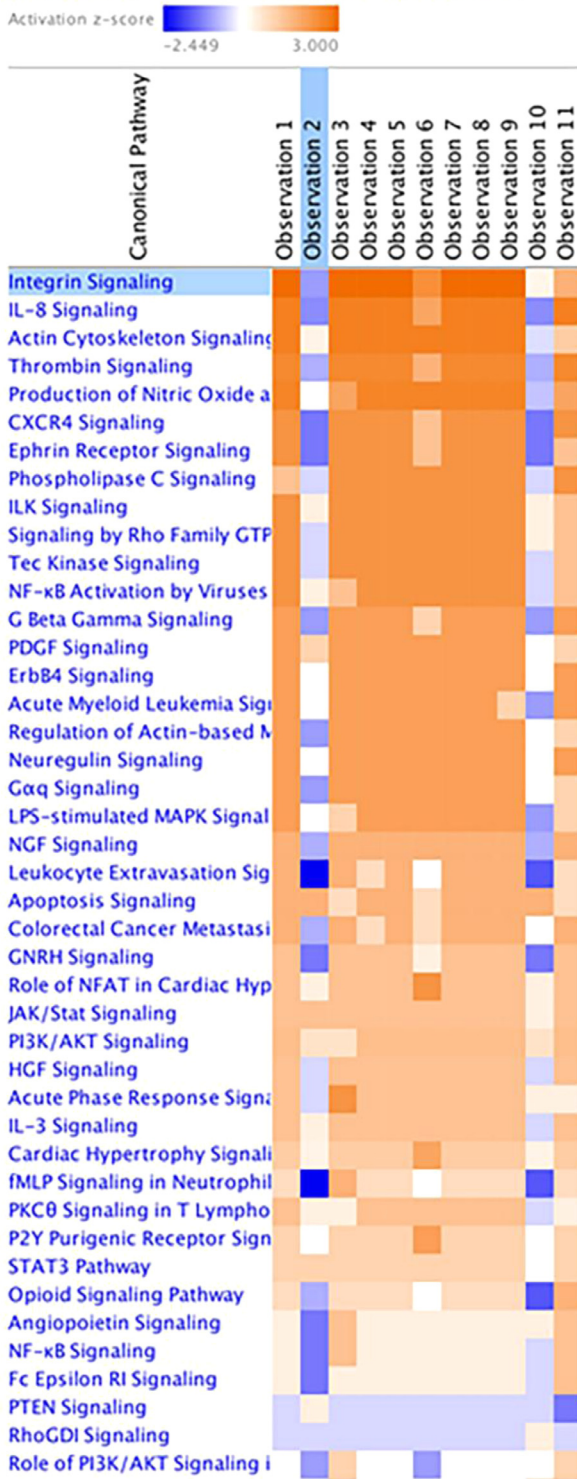

### CD97 Z-SCORE<-1

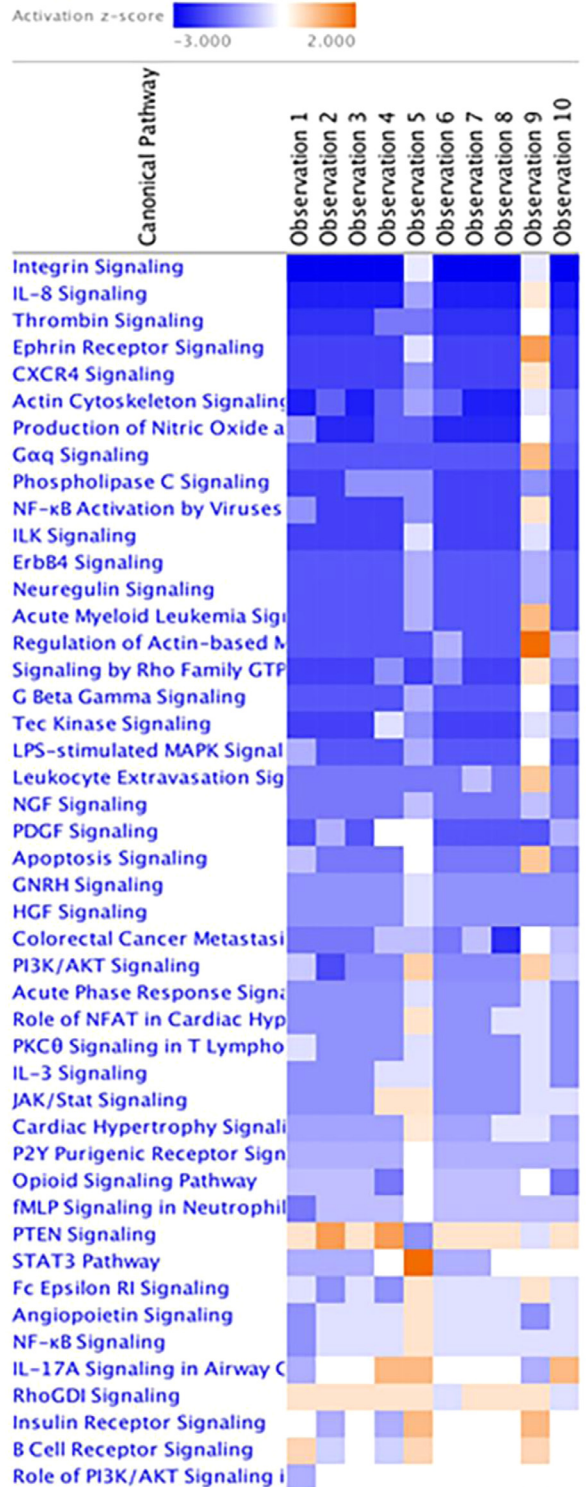

**Figure S7. Cell signaling pathway analysis associated with CD97** Patients were grouped in CD97 high ( $Z > 2$ ) and CD97 low ( $Z < -1$ ). Pearson correlation scores of CD97 vs all the available gene expression data in TCGA were calculated and analyzed in ingenuity pathway analysis
